# Supplementary material for: Efficient Electrocatalytic Ammonia Synthesis via Theoretical Screening of Titanate Nanosheet-Supported Single-Atom Catalysts
Source: MDPI journal article supplement (doi:10.3390/ma17102239), 2024-05-09
Supplement: s1 [file s1]

Supplementary materials

# Efficient Electrocatalytic Ammonia Synthesis via Theoretical Screening of Titanate Nanosheet-Supported Single-Atom Catalysts

Kaiheng Zhao <sup>1</sup>, Jingnan Wang <sup>1</sup>, Yongan Yang <sup>1,\*</sup> and Xi Wang <sup>2,3,\*</sup>

<sup>1</sup> Institute of Molecular Plus, School of Chemical Engineering and technology, Tianjin University, Tianjin 300072, China

<sup>2</sup> Key Laboratory of Luminescence and Optical Information, Ministry of Education, School of Physical Science and Engineering, Beijing Jiaotong University, Beijing 100044, China

<sup>3</sup> Tangshan Research Institute of Beijing Jiaotong University, Tangshan 063000, China

\* Correspondence: xiwang@bjtu.edu.cn (X.W.); revned\_yang@tju.edu.cn (Y.Y.)

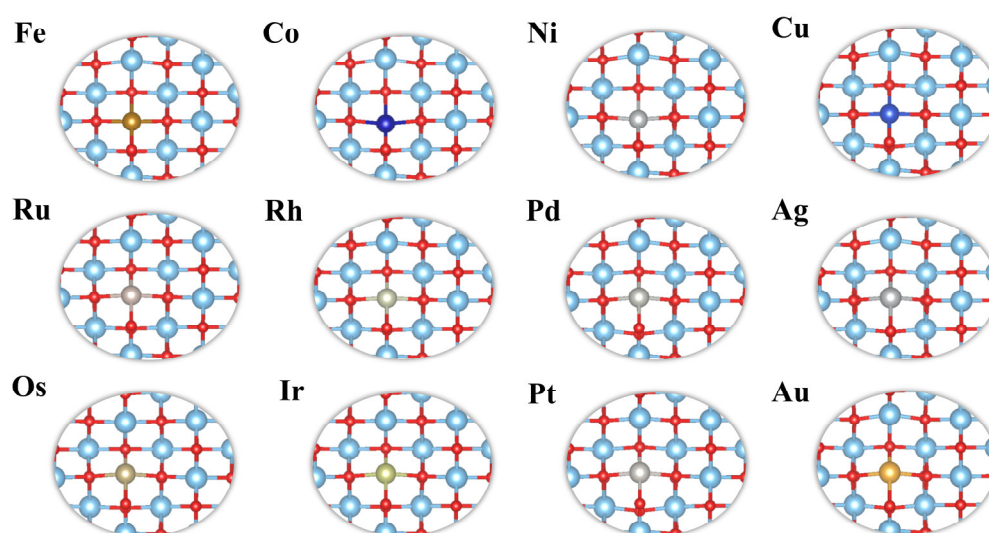

**Figure S1.** The adsorption configurations of M-TiNS.

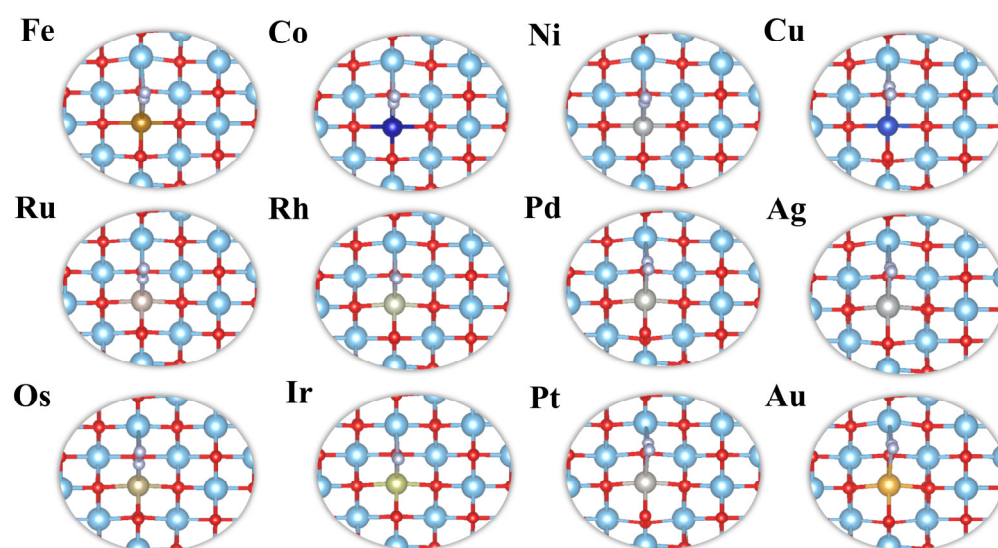

Figure S2. The adsorption configurations of N<sub>2</sub> on M-TiNS.

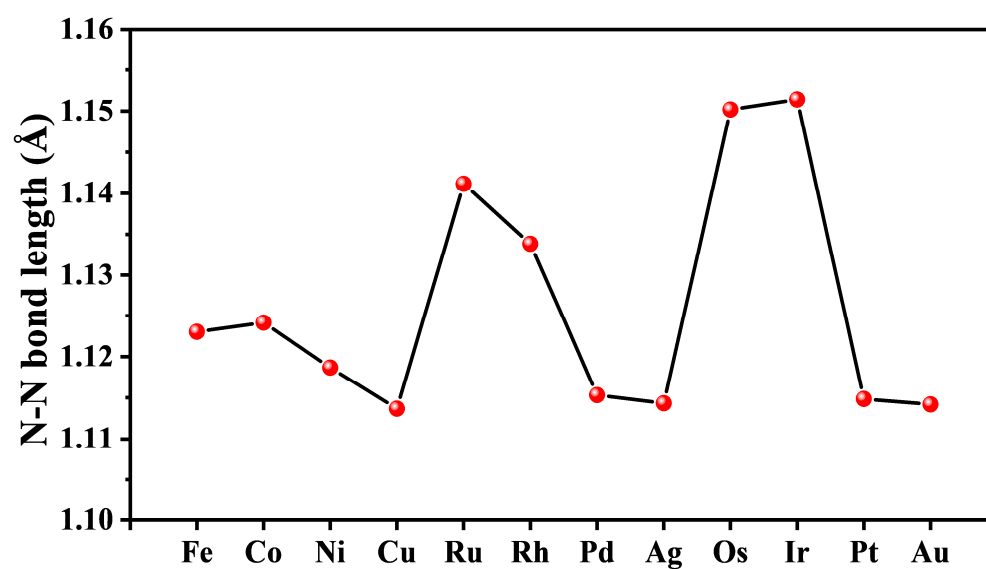

Figure S3. N-N bond length after N<sub>2</sub> adsorption.

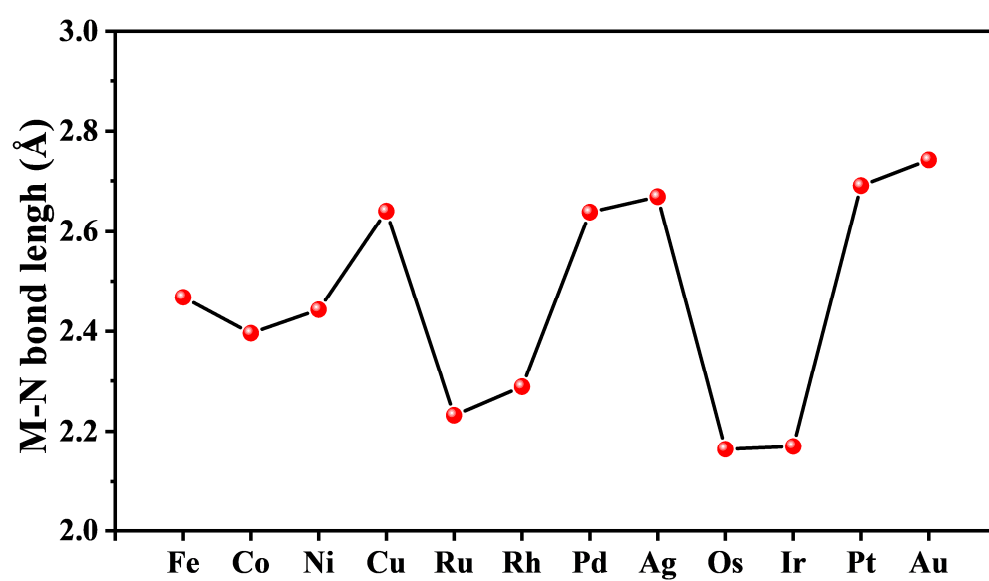

Figure S4. M-N bond length after N<sub>2</sub> adsorption.

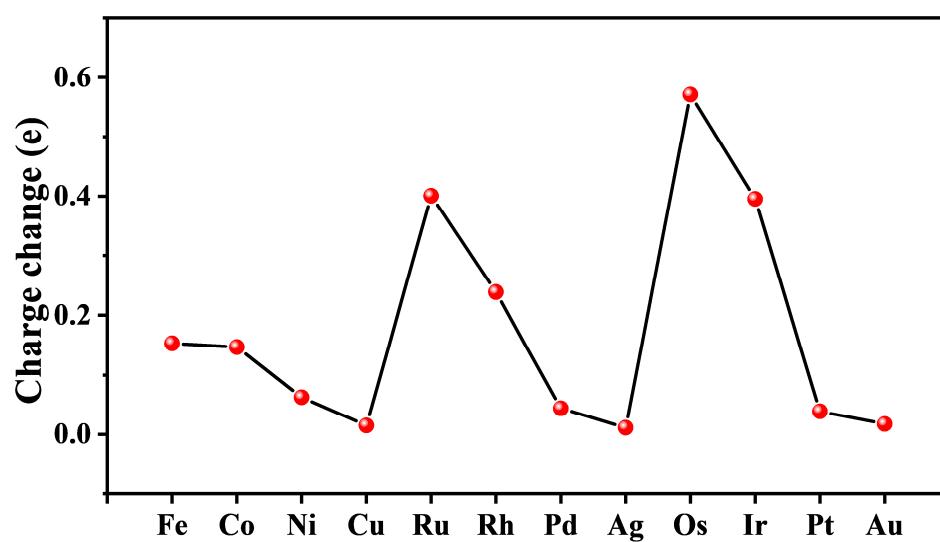

Figure S5. Charge changes after N<sub>2</sub> adsorption.

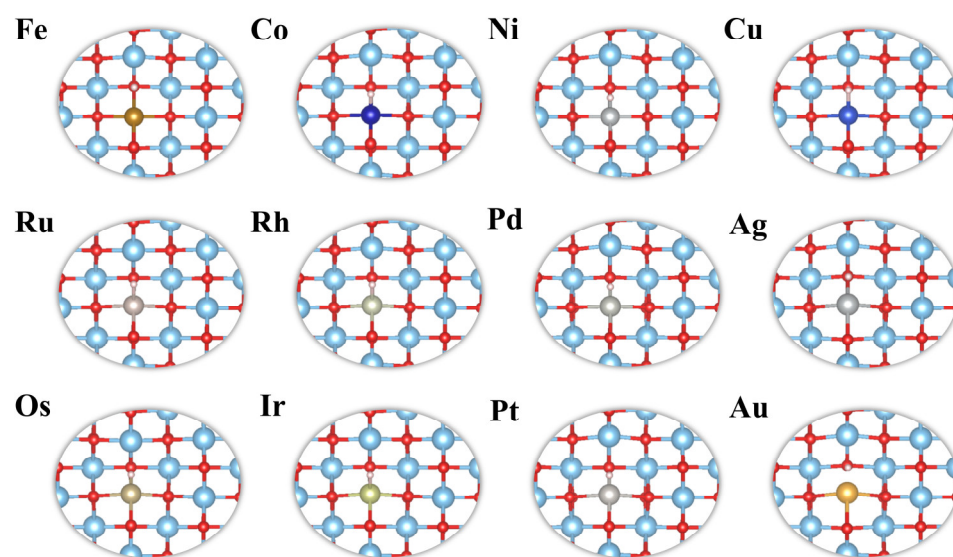

**Figure S6.** The adsorption configurations of  $^*H$  on M-TiNS.

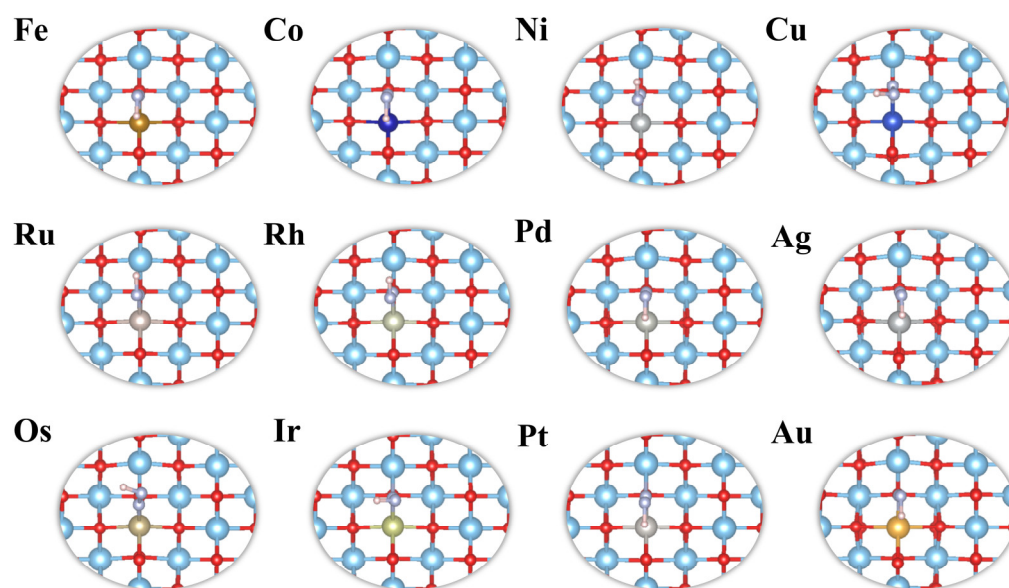

**Figure S7.** The adsorption configurations of  $^*NNH$  on M-TiNS.



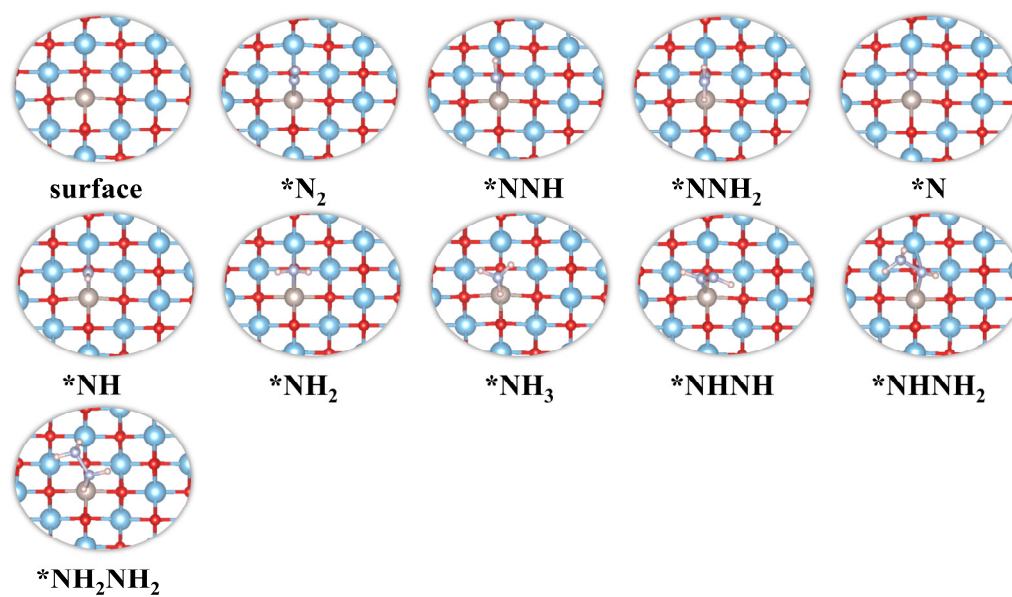

**Figure S8.** Configuration of intermediates in  $N_2$  reduction reaction on Ru-TiNS.

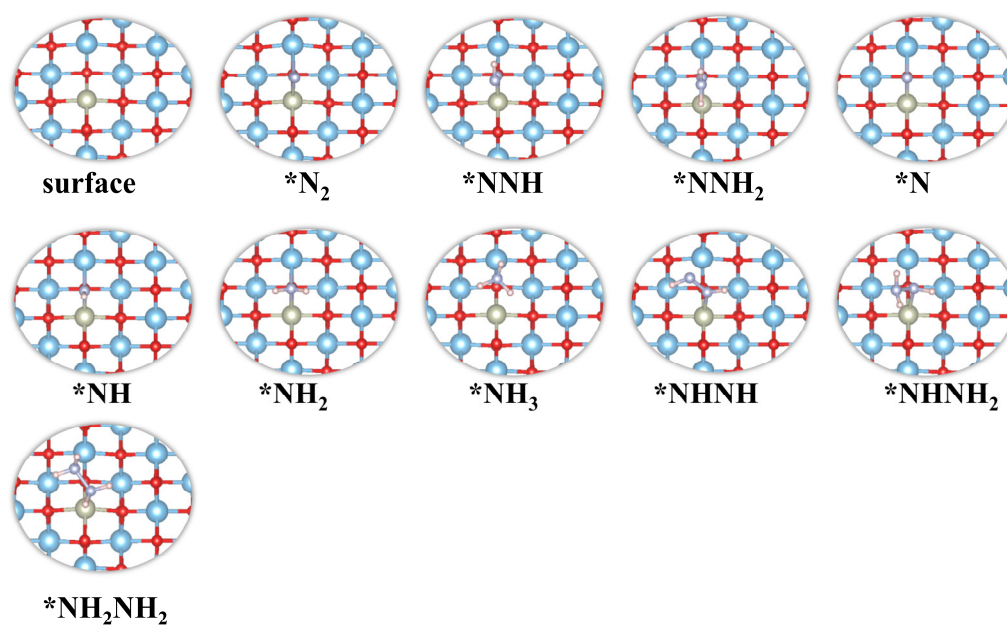

**Figure S9.** Configuration of intermediates in  $N_2$  reduction reaction on Rh-TiNS.

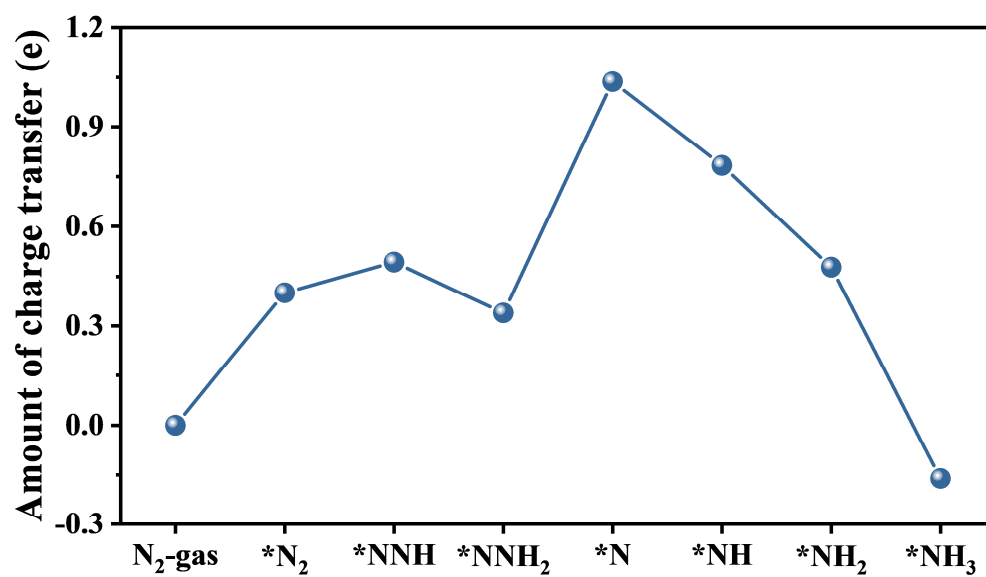

Figure S10. Bader charges of intermediates along the reaction coordinates for in N<sub>2</sub> reduction reaction on Ru-TiNS.

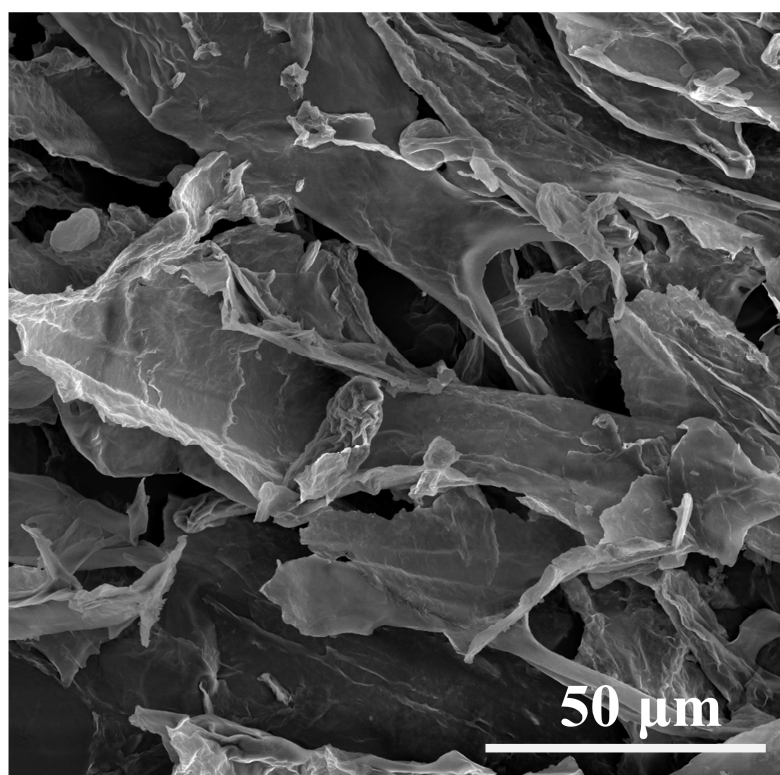

Figure S11. SEM image of pure TiNS support.

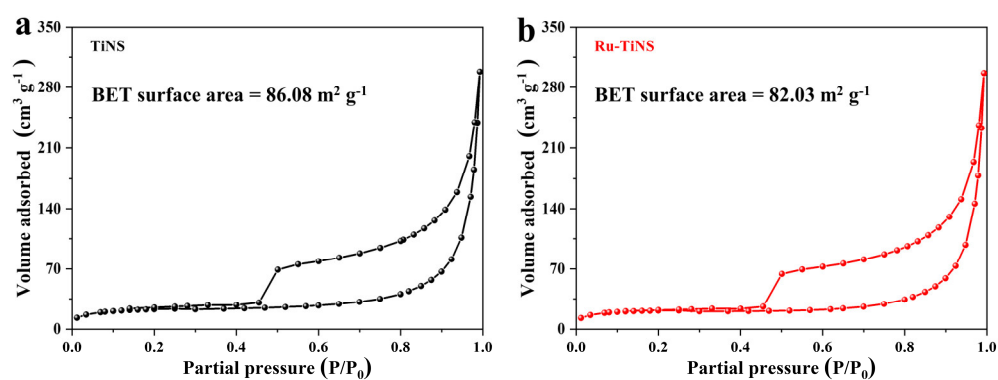

**Figure S12.** Nitrogen adsorption–desorption isotherms and their corresponding surface area of TiNS (a) and Ru-TiNS (b).

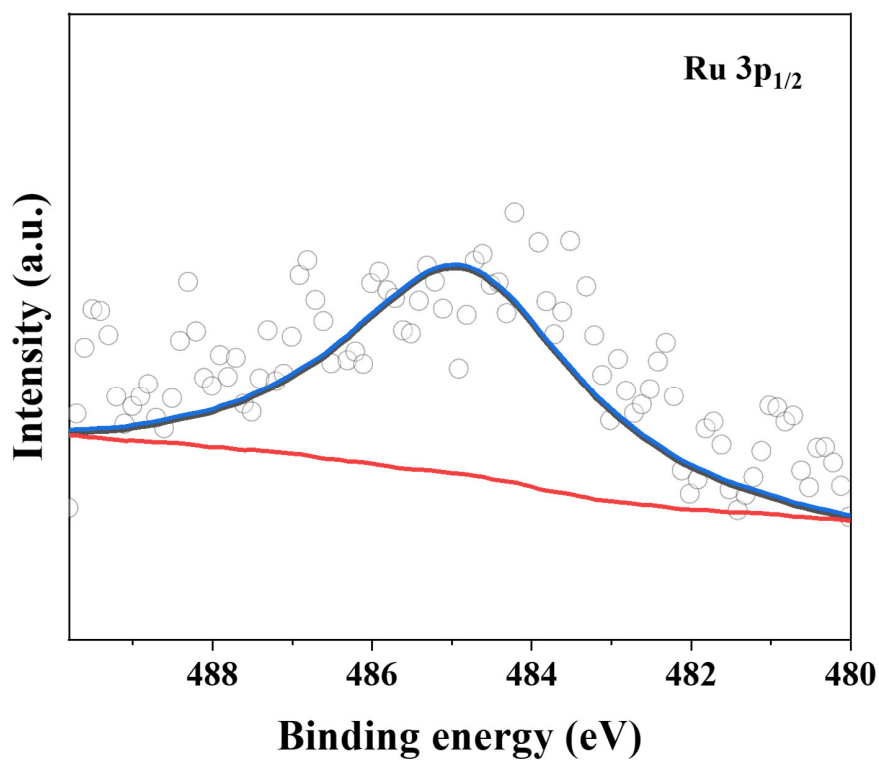

**Figure S13.** High-resolution Ru 3p XPS spectrum of Ru in Ru-TiNS.

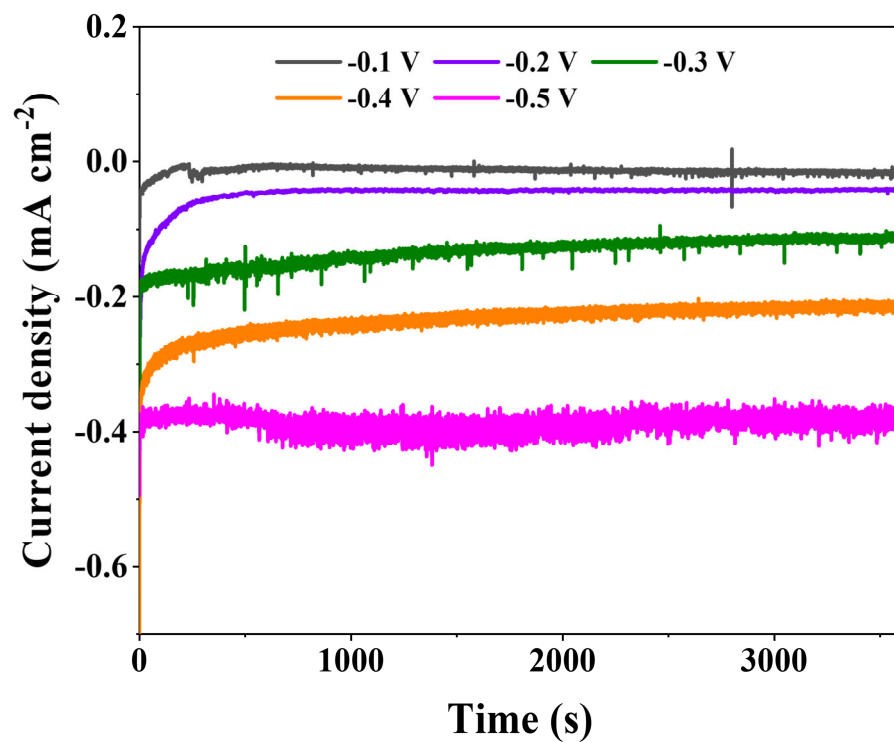

Figure S14. The i-t curves obtained from chronoamperometry tests at different potentials.

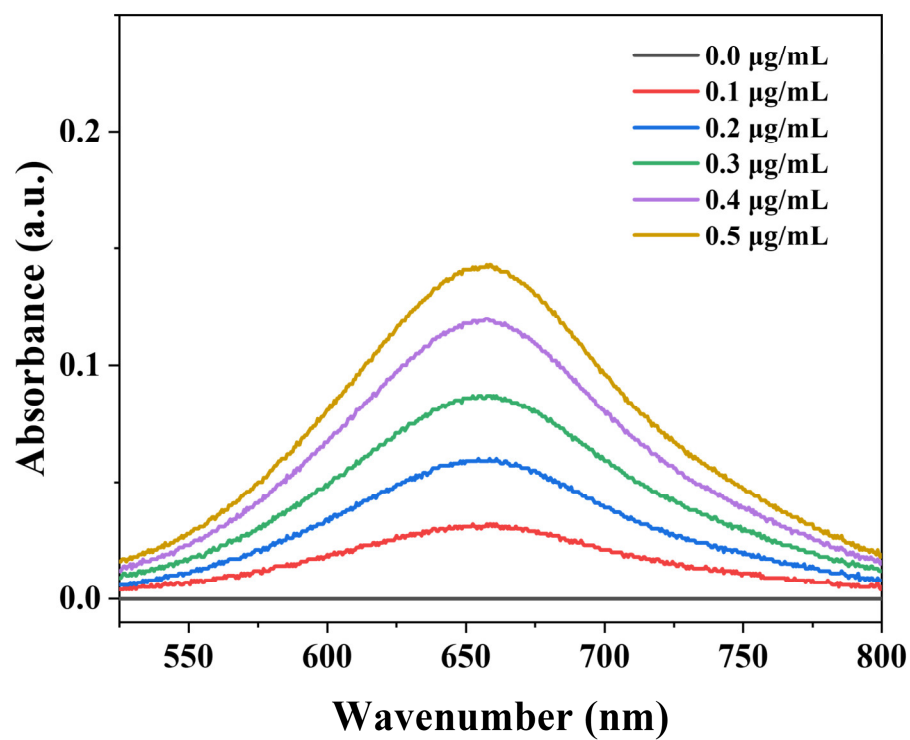

Figure S15. The UV-visible absorption curves corresponding to the coloration of indophenol blue after reaction with  $\text{NH}_4^+$  of different concentrations.

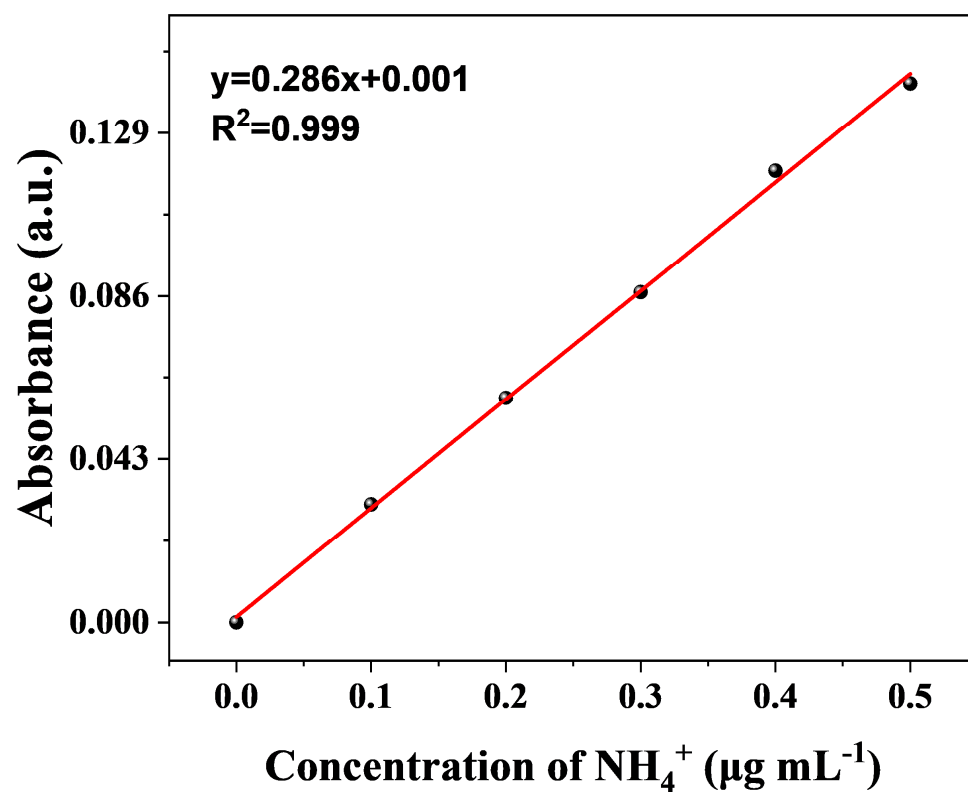

Figure S16. The linear fitting curves of absorbance at 655 nm after coloration by the indophenol blue method for  $\text{NH}_4^+$  of different concentrations.

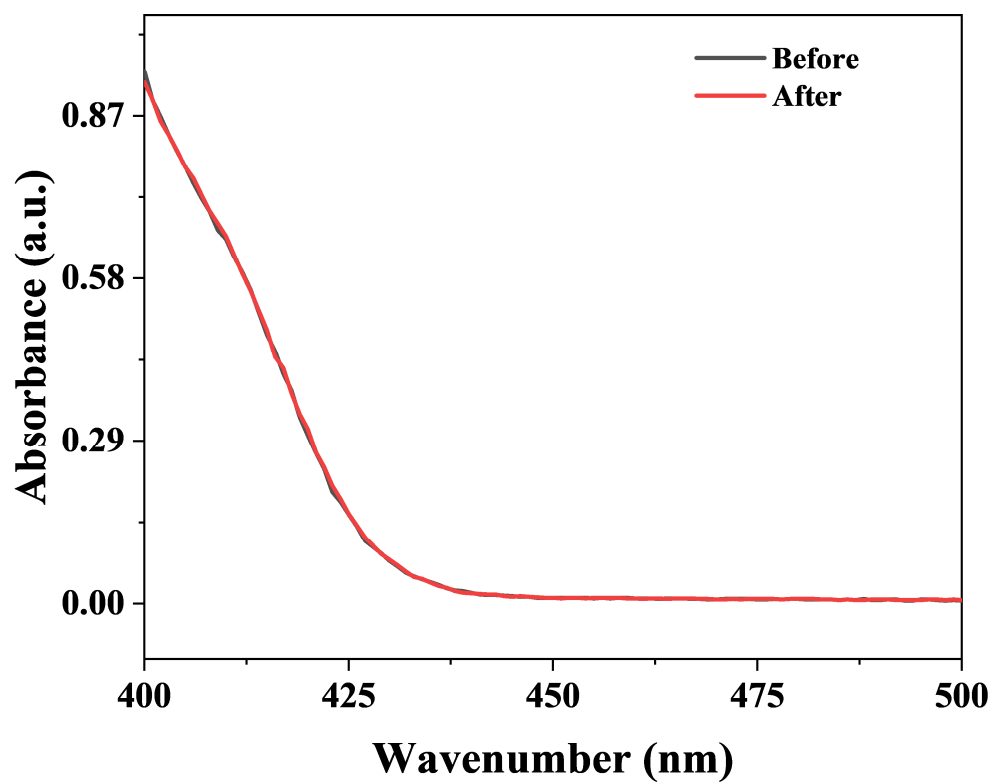

Figure S17. UV-Vis absorbance curves of Ru-TiNS before and after electrolysis at -0.3 V vs. RHE.

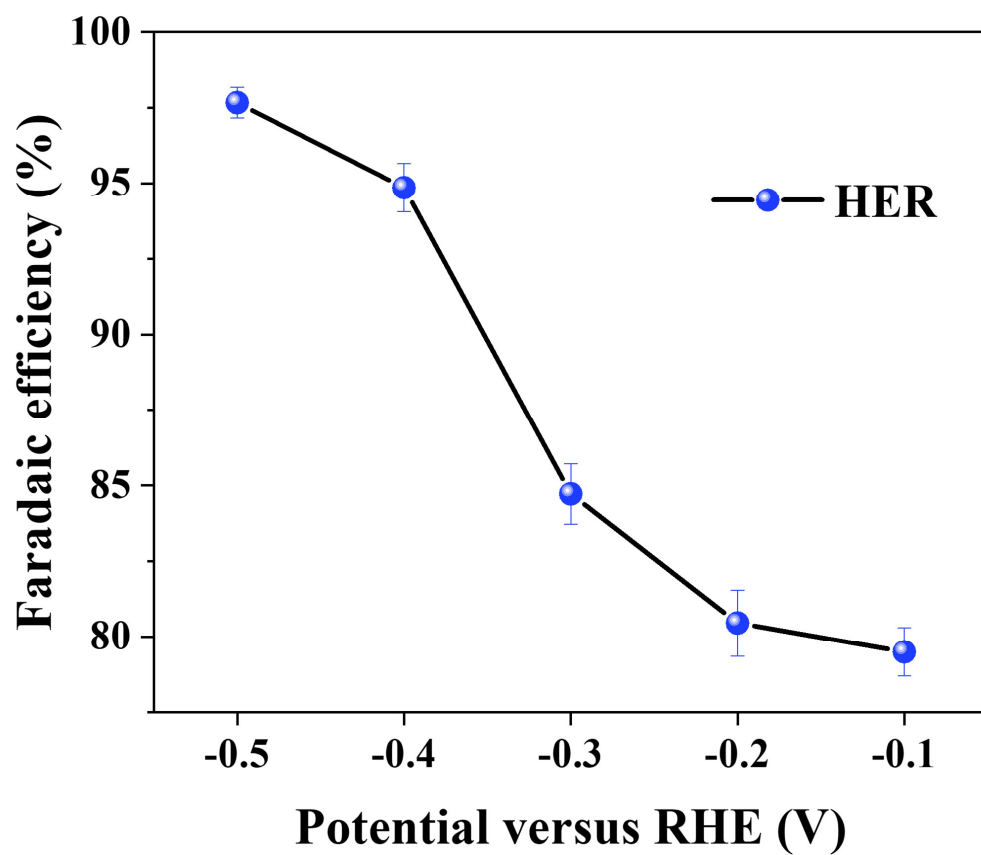

Figure S18.  $\text{FE}_{\text{H}_2}$  of Ru-TiNS at different potentials.

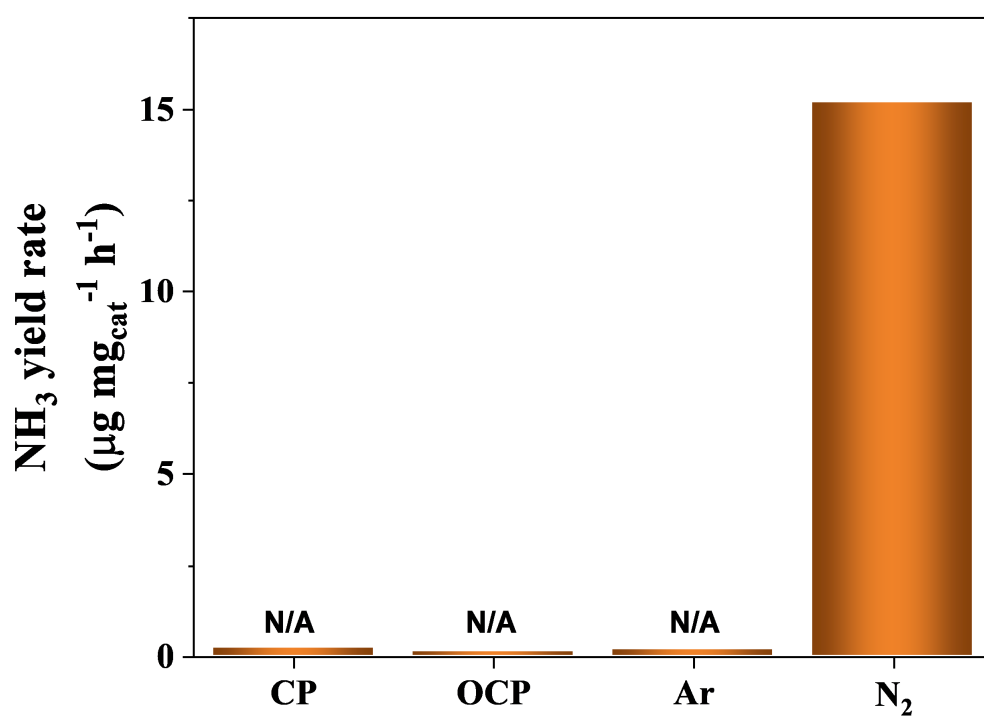

Figure S19.  $\text{NH}_3$  yield rates under different conditions including pure carbon paper (-0.3 V vs. RHE), open circuit potential, only Ar bubbling (-0.3 V vs. RHE), and  $\text{N}_2$  bubbling (-0.3 V vs. RHE).



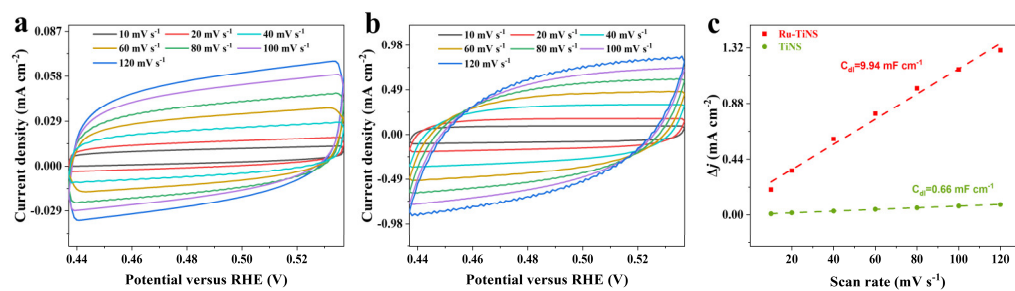

**Figure S20.** CV curves obtained for pure TiNS (a) and Ru-TiNS (b) at different scan rates, along with the corresponding calculated double-layer capacitances (c).

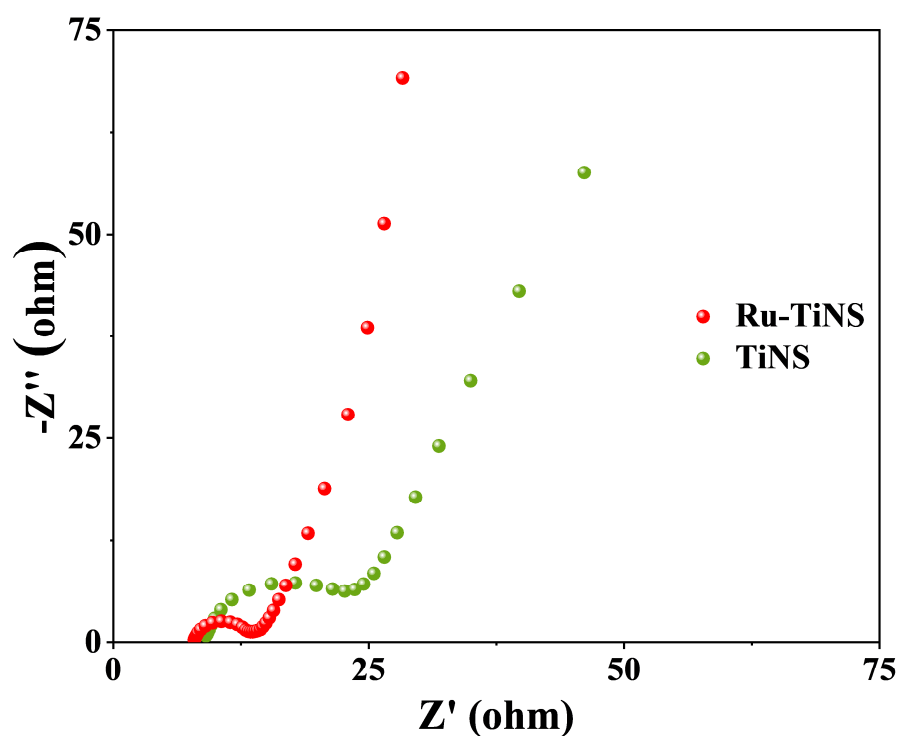

**Figure S21.** Electrochemical impedance spectroscopy (EIS) of Ru-TiNS and TiNS.

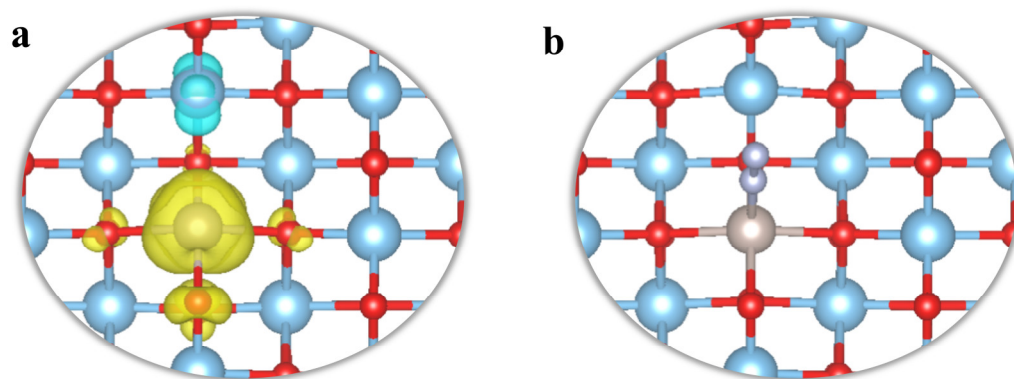

**Figure S22.** The Spin charge density of (a) Ru-TiNS and (b) N<sub>2</sub> adsorption on Ru-TiNS.

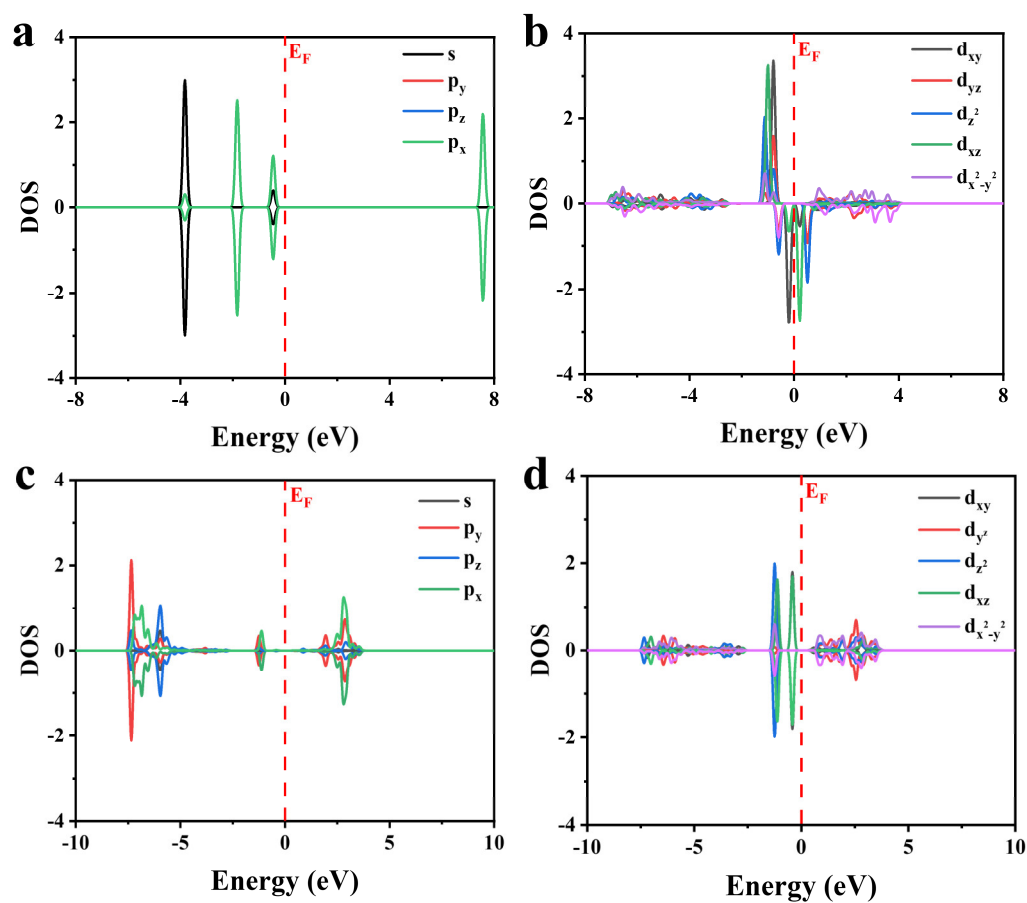

**Figure S23.** The projected density of (a) Free  $N_2$ , (b) Ru 4d in Ru-TiNS, and (c, d)  $N_2$  molecule adsorbed on Ru-TiNS.
